# Supplementary material for: RNN and GNN based prediction of agricultural prices with multivariate time series and its short-term fluctuations smoothing effect
Source: Research Square preprint supplement (doi:10.21203/rs.3.rs-5002992/v1), 2025-04-01
Supplement: Supplementary file 1 [file 32201b7b68cb780a365e39c5.pdf]

## Supplementary Fig. S1

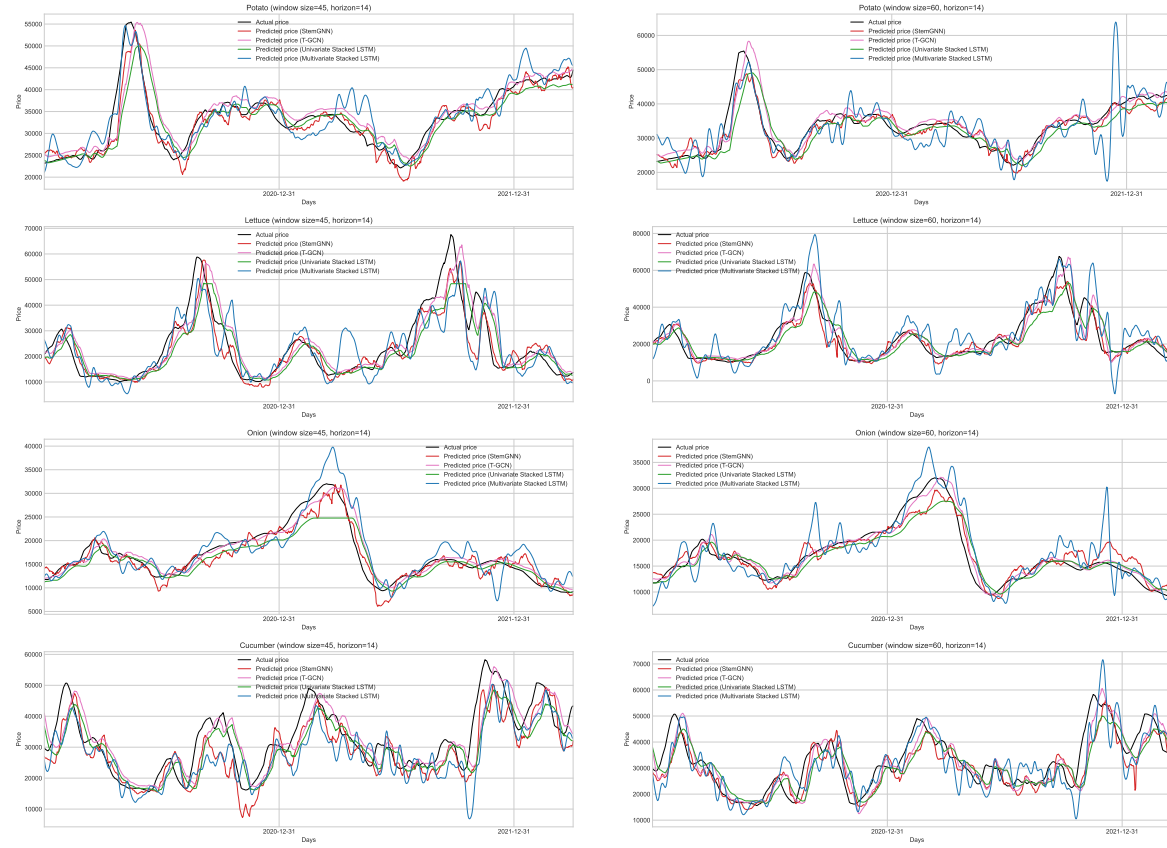

**Supplementary Fig. S1:** The predicted price results for all agricultural commodities with a 28-day rolling window size, window sizes of 45 (left panels) and 60 (right panels), and a prediction horizon of 14 days. The black curve represents the actual price, and the red, pink, green, and blue curves represent the predicted ones of StemGNN, T-GCN, Univariate stacked LSTM, and Multivariate stacked LSTM, respectively.
